# Supplementary material for: Association between Area-Level Socioeconomic Deprivation and Prehospital Delay in Acute Ischemic Stroke Patients: An Ecological Study
Source: PubMed Central journal article supplement (PMC7600419; doi:10.3390/ijerph17207392), 2020-10-11
Supplement: ijerph-17-07392-s001.pdf [file ijerph-17-07392-s001.pdf]

|                                  |        |      |      |      |      |      |        |
|----------------------------------|--------|------|------|------|------|------|--------|
| <b>National Health Insurance</b> | 12,953 | 95.0 | 8090 | 95.6 | 4863 | 94.0 |        |
| <b>Medicaid</b>                  | 684    | 5.02 | 373  | 4.41 | 311  | 6.01 |        |
| <b>EMS use</b>                   | 9232   | 67.7 | 5327 | 62.9 | 3905 | 75.5 | <0.001 |
| <b>Interhospital transfer</b>    | 4052   | 29.7 | 1603 | 18.9 | 2449 | 47.3 | <0.001 |
| <b>Area-level SES</b>            |        |      |      |      |      |      | <0.001 |
| Affluent                         | 4489   | 32.9 | 3637 | 43.0 | 852  | 16.5 |        |
| Middle                           | 4615   | 33.8 | 3519 | 41.6 | 1096 | 21.2 |        |
| Deprived                         | 4533   | 33.2 | 1307 | 15.4 | 3226 | 62.4 |        |

Abbreviations: ED, emergency department; EMS, emergency medical service; SES, socioeconomic status. The *p*-values were calculated using the chi-squared test.

**Supplementary Table S3.** Prehospital time intervals by urbanization status.

|                                      | <b>Total</b>  |            | <b>Urban</b>  |            | <b>Rural</b>  |            | <i>p</i> |
|--------------------------------------|---------------|------------|---------------|------------|---------------|------------|----------|
|                                      | <i>Median</i> | <i>IQR</i> | <i>Median</i> | <i>IQR</i> | <i>Median</i> | <i>IQR</i> |          |
| <b>Total subjects</b>                |               |            |               |            |               |            |          |
| Symptoms to final hospital (hours)   | 4.3           | 1.7–10.4   | 4.0           | 1.3–10.2   | 4.7           | 2.1–10.7   | <.0001   |
| <b>Patients who were transferred</b> |               |            |               |            |               |            |          |
| Symptoms to first hospital (hours)   | 2.9           | 1.0–8.8    | 3.1           | 1.0–9.2    | 2.6           | 1.0–7.9    | <.0001   |
| <b>Patients who used EMS</b>         |               |            |               |            |               |            |          |
| Symptoms to call (min)               | 60            | 12–288     | 60            | 13–303     | 58            | 11–248     | 0.22     |
| Call to EMS arrival (min)            | 6             | 4–10       | 6             | 4–8        | 7             | 5–12       | <.0001   |
| Call to hospital arrival (min)       | 32            | 24–48      | 30            | 24–39      | 51            | 33–75      | <.0001   |

Abbreviations: IQR, interquartile range; EMS, emergency medical service; The *p*-values were calculated using the Wilcoxon rank-sum test.
